# Supplementary figures and images for: DDX17 Specifically, and Independently of DDX5, Controls Use of the HIV A4/5 Splice Acceptor Cluster and Is Essential for Efficient Replication of HIV
Source: PubMed Central journal article supplement — J Mol Biol. 2018 Sep 14;430(18Part B):3111–28. doi: 10.1016/j.jmb.2018.06.052 (PMC6119765; doi:10.1016/j.jmb.2018.06.052), 2018-09-14

a

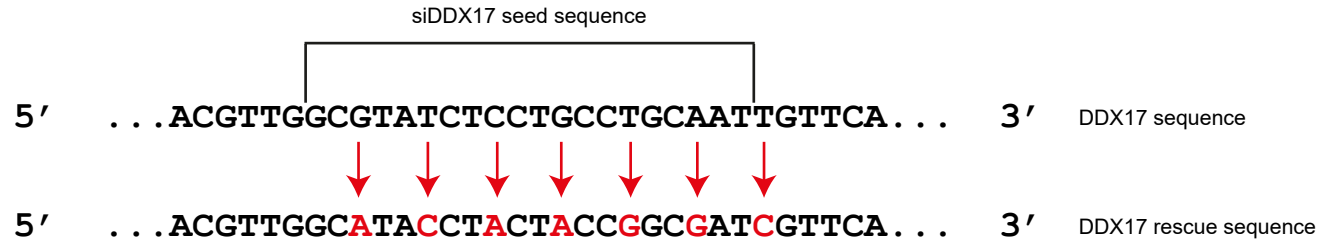

b

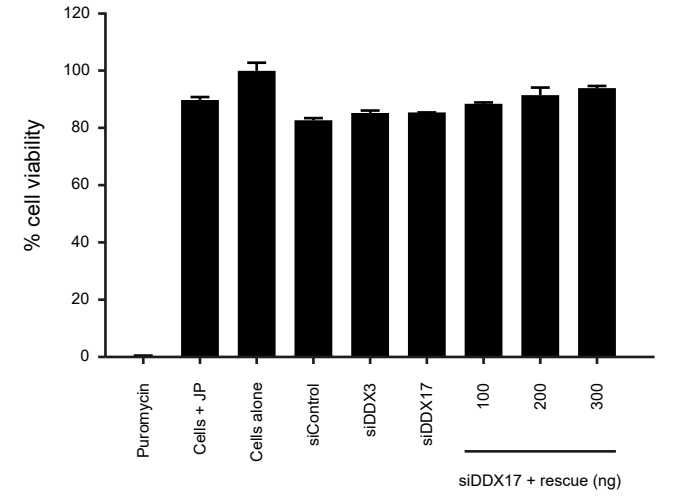

c

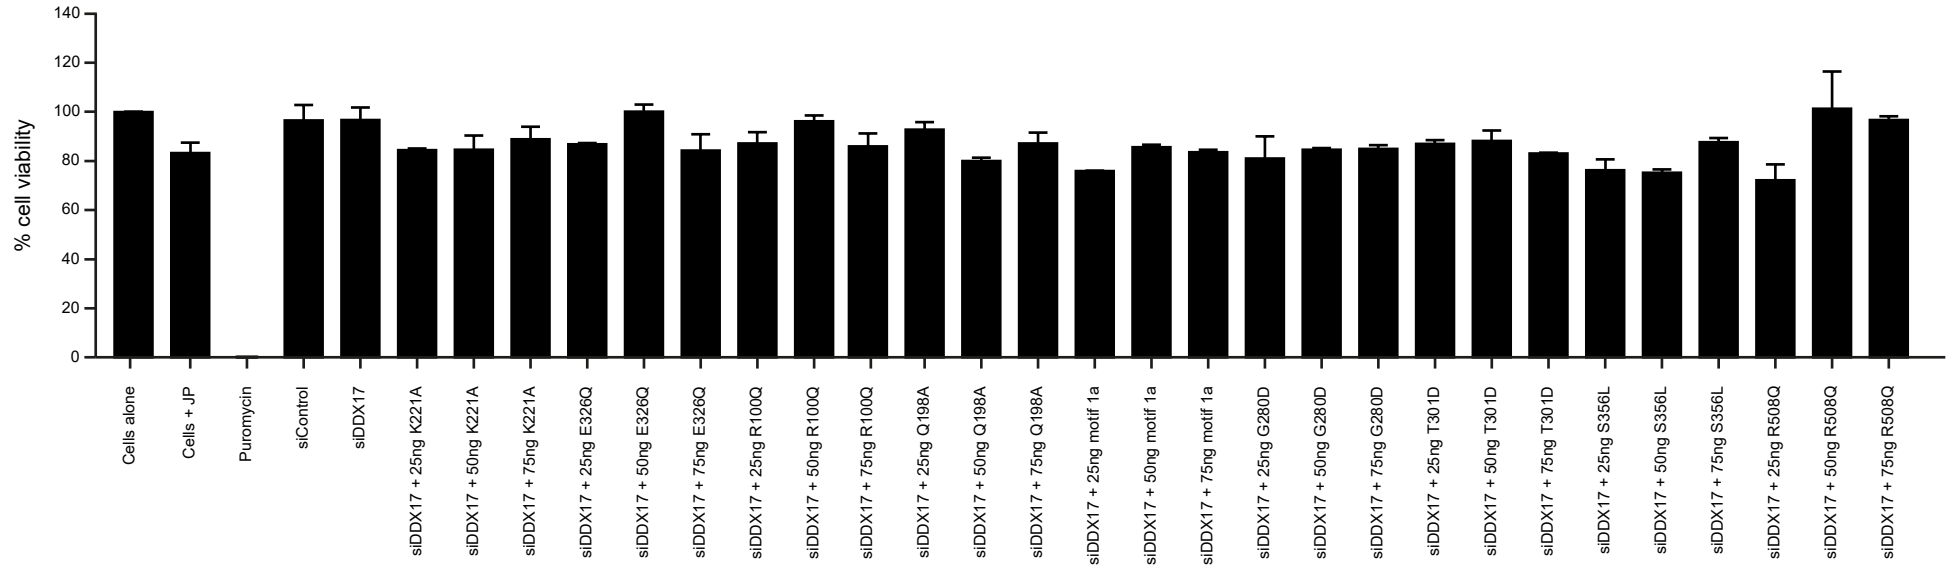

Supplement: mmc1.pdf [file mmc1.pdf]

a

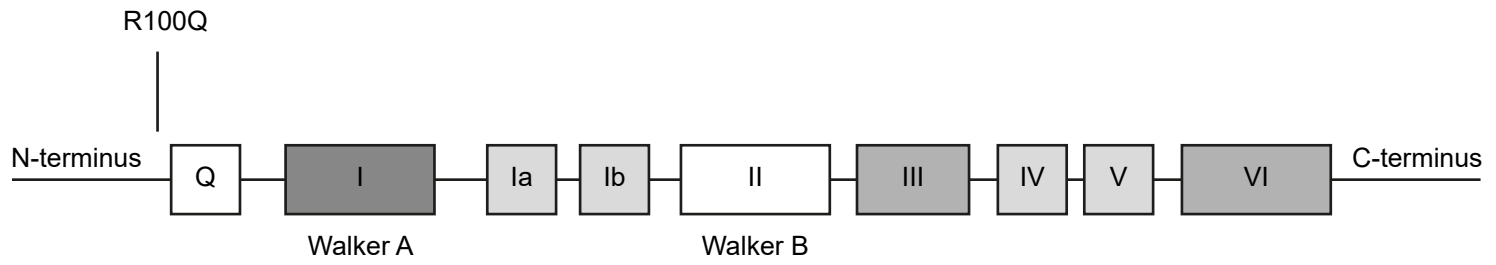

b

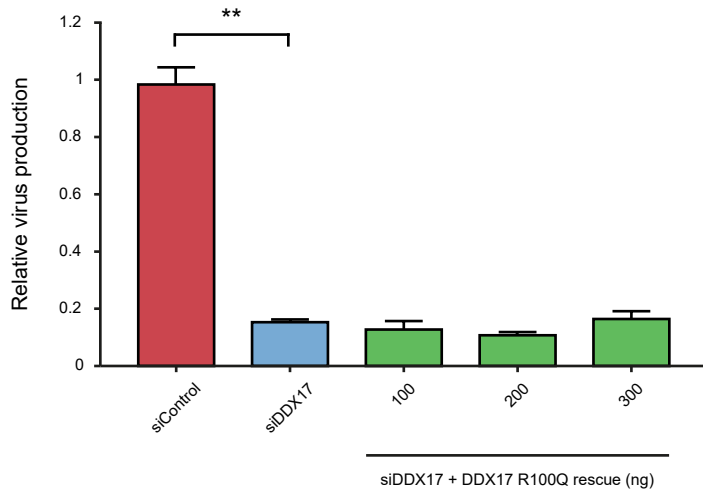

c

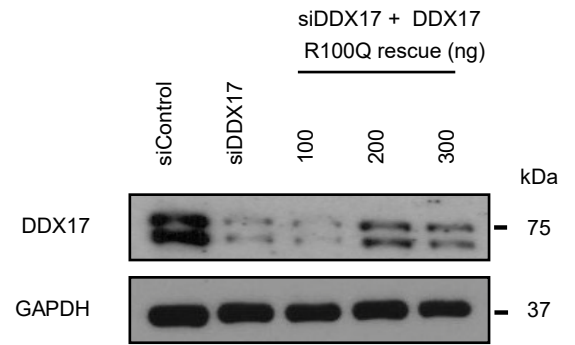

Supplement: mmc2.pdf [file mmc2.pdf]

a

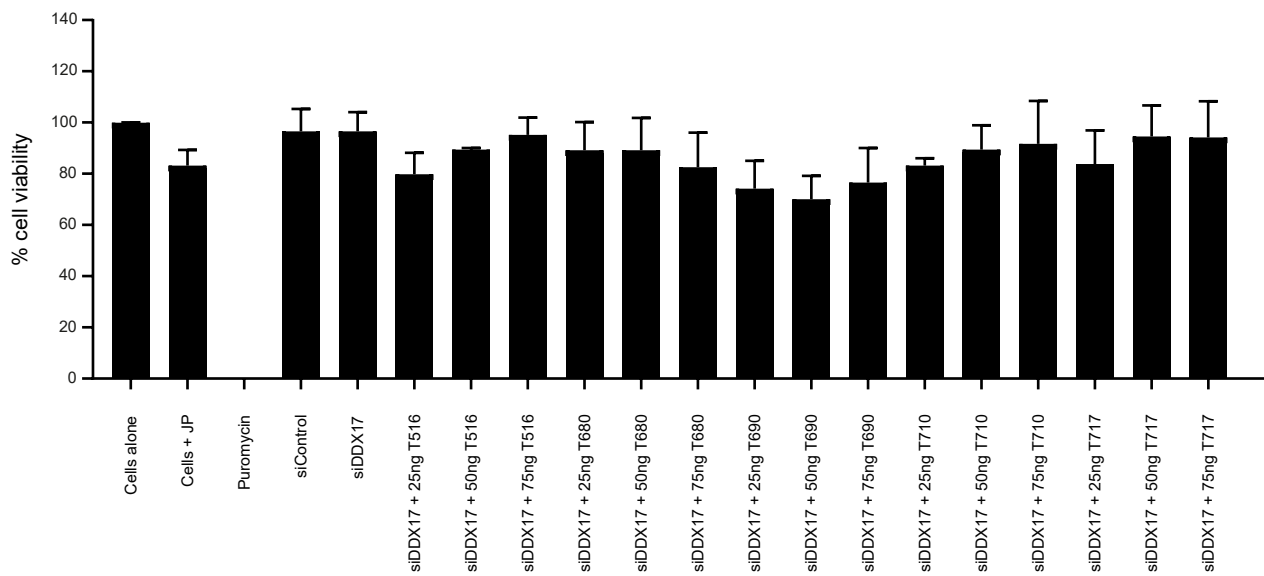

b

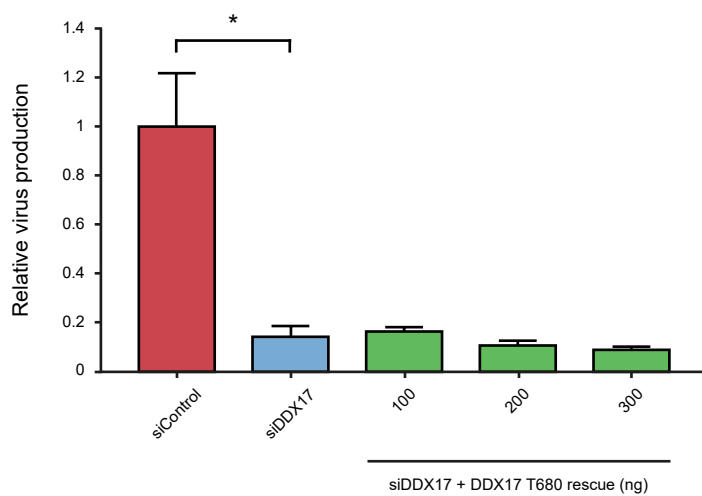

c

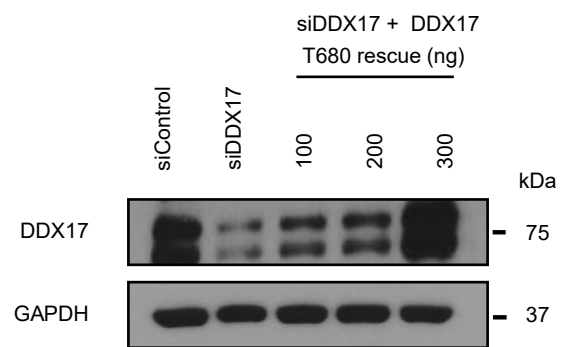

d

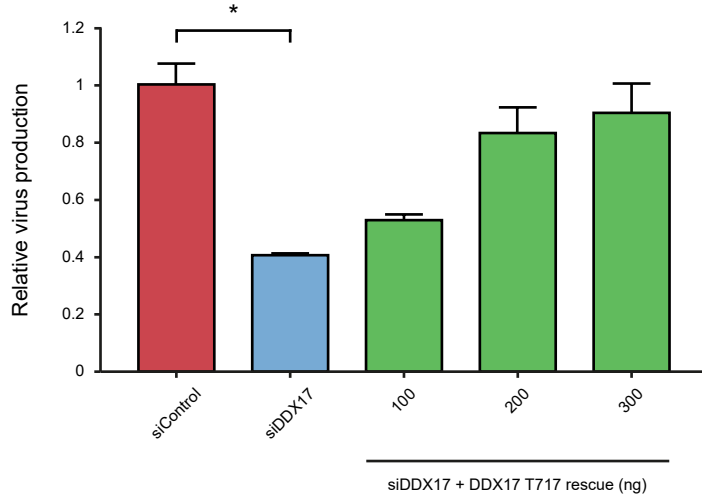

e

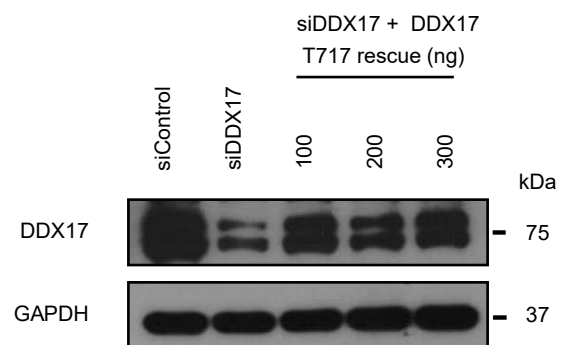

f

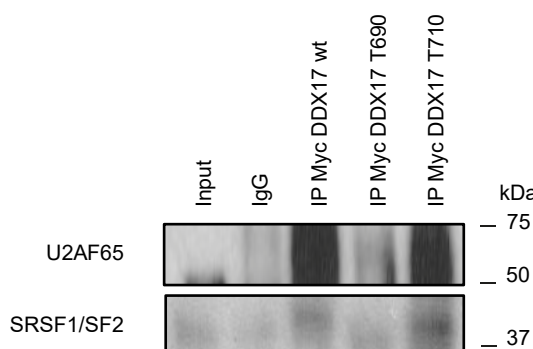

Supplement: mmc3.pdf [file mmc3.pdf]
